# Supplementary material for: Laboratory Diagnostics Accuracy for COVID-19 versus Post-COVID-19 Syndrome in Lung Disease Patients with Multimorbidity
Source: MDPI journal article supplement (doi:10.3390/jpm14020171), 2024-01-31
Supplement: s1 [file s1]

Table S1. Concentration mean and confident interval (CI) in case of biological parameters for patients with COVID-19 and Post Covid infection

|                        | N_COVID19<br>(95% CI) | N_PCI (95% CI)       | Ly_COVID19 (95%<br>CI) | Ly_PCI (95% CI)    | PLT_COVID19 (95%<br>CI)  | PLT_PCI (95% CI)         | CRP_COVID19 (95% CI)    | CRP_PCI (95% CI)        | LDH_COVID19 (95% CI)        | LDH_PCI (95% CI)         |
|------------------------|-----------------------|----------------------|------------------------|--------------------|--------------------------|--------------------------|-------------------------|-------------------------|-----------------------------|--------------------------|
| <b>2021</b>            |                       |                      |                        |                    |                          |                          |                         |                         |                             |                          |
| Hypertension           | 5.70 (2.82 - 11.44)   | 5.68 (1.55 - 10.60)  | 1.86 (0.48 - 9.04)     | 1.54 (0.40 - 2.43) | 251.00 (54.00 - 378.00)  | 283.80 (112.00 - 397.00) | 138.25 (88.00 - 296.00) | 100.99 (68.60 - 161.90) | 294.43 (147.00 - 649.00)    | 276.30 (150.00 - 430.00) |
| Obesity                | 6.46 (6.02 - 6.90)    | 8.03 (2.97 - 14.65)  | 0.79 (0.70 - 0.87)     | 1.84 (1.14 - 2.30) | 175.00 (172.00 - 178.00) | 289.00 (108.00 - 507.00) | 141.19 (90.00 - 193.38) | 89.53 (2.10 - 323.90)   | 1998.40 (1998.40 - 1998.40) | 271.35 (129.90 - 490.00) |
| Diabetes mellitus      | 5.43 (3.48 - 10.53)   | 4.09 (3.08 - 5.09)   | 1.36 (1.06 - 2.08)     | 1.93 (1.47 - 2.39) | 269.67 (54.00 - 378.00)  | 267.00 (145.00 - 389.00) | 78.47 (88.00 - 186.50)  | 153.20 (73.90 - 232.50) | 291.82 (151.00 - 583.90)    | 385.00 (140.00 - 530.00) |
| Ashma                  | 4.21 (4.21 - 4.21)    | 6.31 (4.72 - 7.26)   | 1.41 (1.13 - 1.69)     | 2.69 (2.48 - 2.84) | 249.00 (160.00 - 338.00) | 264.33 (230.00 - 327.00) | 73.00 (25.40 - 120.50)  | 5.27 (2.10 - 7.30)      | 219.50 (189.00 - 250.00)    | 248.47 (171.10 - 380.60) |
| Cardiac diseases       | 7.70 (3.48 - 11.92)   | 5.41 (1.55 - 9.26)   | 1.09 (1.07 - 1.10)     | 0.93 (0.40 - 1.46) | 309.00 (54.00 - 564.00)  | 305.50 (235.00 - 376.00) | 84.00 (80.00 - 88.00)   | 76.85 (68.60 - 85.10)   | 264.95 (151.00 - 378.90)    | 365.00 (150.00 - 480.00) |
| Hypothyroidism         |                       | 3.77 (1.55 - 9.42)   |                        | 1.13 (0.56 - 1.99) |                          | 257.75 (164.00 - 397.00) |                         | 92.18 (85.10 - 113.00)  |                             | 279.50 (170.00 - 488.00) |
| COPD                   |                       | 9.03 (3.68 - 17.91)  |                        | 1.08 (0.36 - 1.45) |                          | 369.00 (162.00 - 441.00) |                         | 80.31 (1.10 - 391.60)   |                             | 421.14 (156.00 - 589.00) |
| Pleurisy               |                       | 7.97 (3.15 - 9.11)   |                        | 1.62 (0.57 - 2.91) |                          | 453.90 (140.00 - 599.00) |                         | 42.38 (7.20 - 120.90)   |                             | 359.21 (217.00 - 478.00) |
| NBP                    |                       | 14.44 (3.62 - 20.36) |                        | 1.96 (0.56 - 4.12) |                          | 564.00 (162.00 - 699.00) |                         | 109.13 (4.10 - 381.60)  |                             | 416.00 (169.00 - 689.00) |
| Chronic renal diseases | 3.73 (3.48 - 4.21)    |                      | 1.12 (0.60 - 1.69)     |                    | 217.67 (54.00 - 338.00)  |                          | 67.10 (8.80 - 167.20)   |                         | 216.60 (151.00 - 282.20)    |                          |
| <b>2022</b>            |                       |                      |                        |                    |                          |                          |                         |                         |                             |                          |
| Hypertension           | 4.77 (2.07 - 11.28)   | 6.01 (1.09 - 18.36)  | 1.05 (0.35 - 2.05)     | 1.95 (0.56 - 4.62) | 218.58 (115.00 - 413.00) | 292.14 (125.00 - 499.00) | 22.40 (1.60 - 76.80)    | 45.48 (1.10 - 381.60)   | 239.17 (145.20 - 381.20)    | 266.80 (156.00 - 489.00) |
| Obesity                | 3.92 (2.26 - 4.84)    | 7.69 (2.25 - 18.36)  | 1.37 (0.35 - 2.61)     | 1.64 (0.56 - 3.39) | 193.50 (152.00 - 300.00) | 310.17 (162.00 - 438.00) | 40.90 (9.20 - 76.80)    | 78.12 (1.10 - 381.60)   | 267.93 (137.70 - 324.00)    | 251.70 (156.00 - 489.00) |
| Diabetes mellitus      | 4.43 (2.26 - 7.13)    | 7.57 (1.09 - 18.91)  | 0.92 (0.35 - 1.49)     | 1.65 (0.56 - 3.94) | 223.50 (152.00 - 413.00) | 301.36 (162.00 - 438.00) | 40.10 (18.10 - 76.80)   | 65.82 (1.10 - 381.60)   | 258.95 (202.00 - 323.00)    | 277.56 (156.00 - 489.00) |
| Asthma                 |                       | 5.40 (2.31 - 7.26)   |                        | 1.71 (1.03 - 2.74) |                          | 274.00 (162.00 - 333.00) |                         | 24.13 (6.40 - 38.40)    |                             | 229.17 (193.70 - 255.00) |
| Cardiac diseases       | 5.49 (2.07 - 11.28)   | 9.02 (2.31 - 18.91)  | 0.81 (0.35 - 1.57)     | 1.37 (0.56 - 2.73) | 205.11 (142.00 - 367.00) | 277.91 (140.00 - 499.00) | 39.70 (1.60 - 111.00)   | 71.14 (2.00 - 381.60)   | 251.49 (156.00 - 381.20)    | 293.03 (156.00 - 489.00) |
| COPD                   | 3.97 (2.07 - 4.97)    | 11.03 (3.68 - 18.91) | 1.60 (0.45 - 2.61)     | 1.08 (0.56 - 1.80) | 197.40 (142.00 - 263.00) | 269.00 (162.00 - 341.00) | 24.90 (12.00 - 57.20)   | 84.61 (1.10 - 381.60)   | 273.40 (156.80 - 381.20)    | 321.14 (156.00 - 489.00) |
| Hypotiroidism          |                       | 4.77 (1.65 - 8.42)   |                        | 1.15 (0.40 - 1.92) |                          | 357.75 (164.00 - 497.00) |                         | 62.18 (45.10 - 213.00)  |                             | 284.00 (170.00 - 488.00) |
| Pleurisy               |                       | 5.97 (3.55 - 9.11)   |                        | 1.52 (0.57 - 2.71) |                          | 293.90 (140.00 - 499.00) |                         | 42.38 (7.20 - 120.90)   |                             | 289.21 (217.00 - 378.00) |
| Tuberculosis           |                       | 12.44 (2.62 - 18.36) |                        | 1.66 (0.56 - 3.12) |                          | 364.00 (162.00 - 499.00) |                         | 109.13 (4.10 - 381.60)  |                             | 316.00 (169.00 - 489.00) |

N=neutrophils; Ly=lymphocytes; PLT=platelets; CRP=C-reactive protein; LDH=lactate-dehydrogenase
